# Supplementary material for: Diagnosis of mast cell activation syndrome: a global “consensus-2”
Source: publisher site journal article supplement (doi:10.1515/dx-2020-0005), 2020-04-22
Supplement: Supplementary file 1 [file dx-2020-0005_suppl.doc]

**Supplementary Table 1:** Proposals for diagnostic criteria for mast cell activation syndrome (MCAS).

| Popular/Proposed Moniker(s): “Valent et al.” criteria, “consensus” criteria, “consensus-1” criteria  Publication History:   1. First Publication: 2012 [1] 2. Most Recent Revision: 2019 [2]   Origin/Roots of the Proposal: The first Valent et al. “consensus” proposal was developed as an outcome of a meeting of MC disease experts organized at the Medical University of Vienna (MUV) in September 2010 by Peter Valent, M.D., an MUV hematologist/oncologist well known internationally for his long-time expertise in mastocytosis. Attendance at the meeting was by invitation; roughly two-thirds of the authors were European mastocytosis experts, and one-third were U.S. mastocytosis experts. The Valent et al. proposal was ultimately published in January 2012, a collaboration of 19 of the September 2010 meeting’s attendees, including the editor-in-chief of the publishing journal who also, at the time of the meeting and at the time of the article’s publication, was chief of the MUV Department of Allergy. It is unknown how many MCAS patients the authors had personally attended prior to submission of their paper in 2011, but given that the first case reports of MCAS were published only in 2007, and given that this “consensus” group has consistently estimated MCAS to be fairly rare (like mastocytosis), it seems unlikely that the extent of this group’s experience with MCAS at the time of submission of their paper would have been significantly greater, at the time of their submission of their paper, than the extent of the experience with MCAS held by the authors of the Molderings et al. criteria. However, one could wonder that the extent of the consensus-1 group’s substantial prior experience with SM could have biased them against recognition of MCAS in patients without SM. The Valent et al. proposal was built upon an initial proposal published inDecember 2010 [3] by Dr. Cem Akin, an internationally recognized Harvard University-based mastocytosis expert, Dr. Valent, and Dr. Dean Metcalfe, also an internationally recognized mastocytosis expert and senior researcher at the U.S. National Institutes of Health (NIH). The Akin et al. paper, which coined the term “mast cell activation syndrome” (MCAS) and was the first to identify this entity as a disease distinct from the allergic-type diseases and SM, also offered the first codified proposal for diagnostic criteria for MCAS [3(Table II)]. These criteria required an MCAS patient demonstrate (1) episodic symptoms consistent with multisystem effects from MC mediator release (though consideration of such symptoms was restricted to just five specific organ systems and just a small number of symptoms in each of these systems), (2) clinical response (i.e., decrease in frequency or severity of symptoms) to MC-targeted therapies (which were limited in this proposal to just H1/H2 histamine receptor blockers, leukotriene pathway inhibitors, and cromolyn), (3) increase in at least one “validated” urinary or serum marker of MCA (further defined as a rise of a marker, during at least two symptomatic periods, to greater than a “baseline value,” with tryptase as the recommended marker of choice, though 24-hour urinary *N*-methylhistamine or prostaglandin D2 or 11-β-prostaglandin-F2α were also acceptable markers), and (4) exclusion of other causes of MCA. These criteria were soon criticized [4] from several perspectives, principally the restrictions on laboratory assessment for the disease. The exclusion of other organ systems and symptoms was questioned, as was the requirement to demonstrate therapeutic response prior to diagnosis to the narrow range of therapies listed [5].  Criteria per Original Publication [1] (developing upon the 2010 criteria [3]):   | Criteria for mast cell activation (MCA):   1. Typical clinical symptoms (flushing, pruritus, urticaria, angioedema, nasal congestion, nasal pruritus, wheezing, throat swelling, headache, hypotension, diarrhea) 2. Increase in serum total tryptase by at least 20% above baseline plus 2 ng/ml during or within 4 h after a symptomatic period 3. Response of clinical symptoms to H1/H2 histamine receptor blockers or “MC-targeting” agents, e.g., cromolyn | | --- | | Diagnosis made by first demonstrating MCA as defined above and then proceeding with further evaluation: if no MC clonality (i.e., proven “primary” MCAS) or other MC-activating-disease (causing “secondary MCAS”) could be identified, then “idiopathic MCAS” would be the final diagnosis. |   Criteria Per Most Recent Published Revision/Restatement [2]:   | Criteria for mast cell activation syndrome (MCAS):   1. Typical clinical signs of severe, recurrent (episodic) systemic MCA are present (often in form of anaphylaxis) (definition of systemic: involving at least 2 organ systems) (symptoms typically associated with local or systemic MCA include urticaria, flushing, pruritus, angioedema, nasal congestion, nasal pruritus, wheezing, throat swelling, hoarseness, headache, hypotensive syncope, tachycardia, abdominal cramping, and diarrhea) 2. Involvement of MCs is documented by biochemical studies; preferred marker: increase in serum tryptase level from the individual’s baseline to plus 20% + 2 ng/mL; other MC-derived markers of MCA (histamine and histamine metabolites, PGD2 metabolites, and heparin) have also been proposed, but are less specific compared with tryptase 3. Response of symptoms to therapy with MC-stabilizing agents, drugs directed against MC mediator production, or drugs blocking mediator release or effects of MC-derived mediators | | --- | | Diagnosis made by demonstrating all three of the above-noted criteria; the diagnosed individual should then be assessed for primary, secondary, or idiopathic MCAS as outlined previously. |   Published Criticisms:   1. The original proposal [1] stated that the 2010 meeting attendees unanimously agreed that “it is of importance to define MCA using accepted, objective, easily measurable, and commonly applicable parameters and criteria,” though it was later noted [e.g., 5] that it was unclear (1) how many of the listed symptoms or the therapeutic response could be easily and objectively (i.e., accurately and reproducibly) *measured*, (2) why other symptoms/signs very commonly seen in MCAS (e.g., severe fatigue, cognitive dysfunction, dermatographism, etc.) were not included, (3) what the objective basis of the tryptase formula newly introduced in this paper was, (4) how the new tryptase formula could be “easily measured,” and (5) again, how widely “accepted” it was to require that treatments be applied prior to diagnosis and how appropriate it would be to rule out a diagnosis of MCAS based on failure of such an extraordinarily heterogeneous disease to respond to the listed treatments. 2. These authors defined their proposal, in the title of their paper, as a “consensus” proposal, but the validity of the “consensus” was unclear. We are unaware of any open call for participation in the September 2010 meeting. Some readers [e.g., 6] have since misinterpreted this paper as describing a consensus after debate within the full community of allergy and MC disease physicians rather than as just a consensus after debate among these authors. 3. Much has been made in the literature (and far more in assorted informal venues) of “20% + 2,” and given that it has been repeatedly asserted by the consensus-1 school as a “diagnostic gold standard” [e.g., 7] (indeed, the only such standard asserted thus far), it deserves special attention to ensure it truly warrants that designation. The original consensus-1 paper [1] reported that, “after extensive discussion and review of key data (published and presented at the conference),” 80% of the attendees (the lowest level of consensus obtained in discussions of the various issues at the meeting) agreed that “20% + 2” should be regarded as indicative of MCA. However, the data supporting “20% + 2” were not included in this paper. Also, no references were provided at this key point in thepaper to support the authors’ assertion that data supporting “20% + 2” had previously been published. In our multiple prior searches of the literature in the decade since the meeting leading to the publication of the original consensus-1 paper, as well as the literature search performed formally for the purposes of this present paper, we have not been able to find any such prior publications, or supporting data published since the original paper, with the sole exceptions of (1) one paper [8] suggesting some validity to “20% + 2” in the setting of perioperative anaphylaxis in 71 patients (“20% + 2” was met in 78% of 71 patients with perioperative anaphylaxis) and (2) one paper [9] suggesting possible validity of “20% + 2” in a study of children presenting to emergency departments with anaphylaxis (“20% + 2” was met in 41 of 68 children (60%) presenting with severe and/or milk-induced anaphylaxis). Therefore, as of early 2020, there remain no published data supporting general validity of this formula in distinguishing the full spectrum of patients with MCAS from people without MCAS. As such – and setting aside concerns by many that MCA (even to an anaphylactic extent) not uncommonly occurs without any rise in tryptase [e.g., 10,11,12] – it is difficult to understand the factual basis for continued assertions that it is a “diagnostic gold standard” for detecting MCA (or even just “severe” MCA, with unclear definition of “severe”) in the general MCAS population, the majority of whom have never experienced anaphylaxis [13]. In fact, our group of investigators has taken informal note of many MCAS patients in whom serum total tryptase levels have actually been measured at lower levels during life-threatening anaphylaxes than at non-anaphylactic baselines. 4. It is unclear how supporting citations were not required during the publication process of the original consensus-1 paper regarding the assertion of previous publication of the “20% + 2” formula, especially given that this formula was the sole laboratory criterion proposed for diagnosis by the consensus-1 criteria. Furthermore, since its initial publication in the original consensus-1 paper, “20% + 2” has been republished and reasserted in a number of other papers (some quite prominently [e.g., 14]), consistently without discussion of the lack of published supporting data. 5. Other problems with “20% + 2” were evident from the outset, too. For one, this rule requires measurement of a “baseline” serum total tryptase once all symptoms of the spell have “completely resolved,” and yet, in our large authorship’s experience, most MCAS patients virtually never see complete resolution of all the symptoms they were suffering during the spell. Rather, most MCAS patients chronically suffer assorted symptoms to one degree or another, with the severity of assorted symptoms worsening during spells/flares. Many MCAS patients come to accept their baseline symptoms as their “normal” state of health, even though in truth the presence of these symptoms to even a mild degree is not truly normal in a healthy individual. Therefore, determining a truly asymptomatic baseline level of serum total tryptase in an MCAS patient would seem to be practically impossible. If the tryptase level varies even slightly in accordance with varying paucisymptomatic levels of mast cell activation, then it becomes quite difficult to determine whether any particular paucisymptomatic level should be an acceptable vs. unacceptable timepoint at which to measure a “baseline” tryptase level. For example, if a patient who meets all other diagnostic criteria for MCAS and merely needs consistent laboratory testing to complete the diagnosis has a serum total tryptase level during a symptomatic spell of 4.5 ng/ml, then a “baseline” serum total tryptase level of 2.0 ng/ml would be sufficient to establish the diagnosis (2.0 + [0.2 x 2.0] + 2 = a diagnostic threshold of 4.4), while a “baseline” serum total tryptase level of merely 2.2 ng/ml would be insufficient (2.2 + [0.2 x 2.2] + 2 = a diagnostic threshold of 4.64). However, the precision of commercially available tryptase assays, together with the inherent modest variability of every biological parameter (even at homeostasis), strongly suggests there is no real difference between “baseline” readings of 2.0 vs. 2.2 ng/ml and thus questions the validity of diagnosing MCAS in (and making treatment available to) the baseline 2.2 patient but not the baseline 2.0 patient. 6. Tryptase is a mediator now understood to be constitutively expressed, at least in its immature “protryptase” form, by virtually all MCs and whose total serum level (measuring both constitutively secreted immature protryptase as well as mature tryptase stored in MC granules and secreted only during MC activation), when measured at non-anaphylactic points, has thus been suggested by more recent research to be far more indicative of the total body MC load than the total body MCA state [15,16,17,18,19,20,21,22,23,24]. Thus, as noted above, a “baseline” level of serum total tryptase is impractical to measure in that one cannot identify which moment in time in a patient with symptoms suggestive of essentially constant MCA is an “appropriate” baseline. Another fundamental impracticality to basing MCAS diagnosis on determining a rise in tryptase during a symptomatic spell, whether by “20% + 2” or any other amount, is the great difficulty many patients experience merely in *accessing* tryptase testing during a symptomatic spell. Firstly, there are the challenges many patients face in merely getting to a medical facility within 4 hours of onset of a flare of symptoms. Then, even with a physician’s order for a tryptase level to be drawn during a symptomatic flare in hand at presentation, most such patients in our experience have this request refused for a variety of reasons. A blood sample taken for a tryptase test will not result for days to weeks later, making the result irrelevant to *emergency* care, which biases emergency physicians against pursuing such testing which, on their performance metrics, will be perceived as escalating the cost of the care they provide for no purpose of perceptible significance in the emergency department. Furthermore, even if the patient presents to the emergency department with another physician’s order in hand to have a tryptase level drawn, if the tryptase level then is actually drawn, it will be drawn under the order of the emergency department physician, not the original requesting physician. The emergency physician then will be responsible for following up on the tryptase result despite having little or no experience with the test. 7. All in all, it would seem more appropriate to base diagnostic laboratory determinations for a chronic disease on testing which can be ordered and followed up by a single continuity physician rather than a complex collaboration of physicians. 8. It is worth noting, too, that “20% + 2” permits diagnosis of MCAS (often a major, life-altering diagnosis) based on the patient achieving a level of a biologic parameter which can easily be well within that parameter’s normal range. For example, if the “baseline” level is 2.0 ng/ml, then any level during a flare up to 4.3 ng/ml fails to qualify for a diagnosis of MCAS, whereas any level during a flare from 4.4 ng/ml to 10.9 ng/ml does qualify for a diagnosis even though such levels remain within the normal range. We are unaware of any disease which permits diagnosis by identifying a test result within the parameter’s normal range. Therefore, diagnosing MCAS by identifying “flared” tryptase levels in the normal range would seem to be an entirely new paradigm for diagnosing illness, immediately raising fundamental questions including what the “normal” range for a test is and what the propriety is of limiting diagnoses of a disease to only cases in which “abnormal” test results can be demonstrated. Of note, there has also been a modicum of debate in the MC disease literature for more than a decade now that perhaps the presently established upper limits of normal for the various commercially available serum total tryptase assays are erroneously high [e.g.,25,26,27,28,29,30] or low [e.g.,23,24,31]. Erroneously elevated upper limits would imply the populations used to establish these normal ranges were “contaminated” by people with unrecognized but prevalent MCAS. However, this particular discussion regarding the validity, or lack thereof, of current normal ranges for various MC mediator levels is beyond the scope of this paper. 9. It is unclear why heparin is felt by the consensus-1 authors to be less specific for MCA than tryptase. Both tryptase and heparin are known to be made only by MCs and basophils, and the production and stocks of both are known to be much greater in MCs than basophils. Similarly, prostaglandin D2 is known to be made by approximately half a dozen different types of cells, but the level of prostaglandin D2 production is far greater in the MC than any of the other types of cells and it usually is quite straightforward to distinguish diseases of the other cells producing prostaglandin D2 from MC disease. 10. It should be noted that the MC produces not just tryptase, histamine, prostaglandin D2, and heparin but more than 1000 other mediators, too [32]. As such, basing laboratory criteria for diagnosis of such an inherently complex and variable disease on a small change in a single parameter (tryptase) whose true validity as a marker of MCA in the great majority of MCA events and MCAS patients is far from well established would seem to be an approach not yet substantiated by published data. 11. The “updated” proposal in 2019 made special point of distinguishing between MCA and MCAS, noting that a diagnosis of MCAS required the presence of “severe and episodic” symptoms of MCA. This requirement would seem to be an unnecessary hurdle (obviously aimed at reducing overdiagnosis of MCAS) given the likelihood that few patients and physicians would pursue the challenging path toward diagnosis of MCAS without the incentive of severe, recurrent/chronic symptoms. The validity of this hurdle seems questionable, too, given that judgment of symptom severity would seem likely to vary greatly among different observers (especially among different specialties), as there are not yet any defined, widely used, objective scales for measuring the symptoms accepted by the consensus-1 criteria as indicative of MCA. 12. The 2019 “update” of the consensus-1 proposal offered largely the same criteria as in 2012 except for deleting consideration of neurologic symptoms, a change quickly criticized on several bases including the great prevalence of such symptoms in the MCAS population [33]. However, in contrast to the original proposal in 2012 (in which, again, no data or citations were offered to support the validity of “20% + 2”), in the section of the 2019 update in which the validity of this formula was re-asserted, a single supporting literature citation was now offered – to the authors’ original 2012 paper [1], thus again leaving the assertion of validity of “20% + 2” unsupported. A paper published very shortly thereafter by a small group of key consensus-1 authors [34] then re-asserted validity to “20% + 2” once again and this time provided two supporting citations, one to the authors’ original 2012 paper [1] and one to the updated2019 paper [2], but, by logical extension, again, the assertion in this paper of any validity to “20% + 2” remains unsupported. |
| --- | --- | --- | --- | --- |
| Popular/Proposed Moniker(s): “Molderings et al.” criteria, “consensus-2” criteria  Publication History:   1. First Publication: 2011 [35] 2. Revised: 2016 [36] 3. Most Recent Revision: 2017 [37]   Origin/Roots of the Proposal: At the time of this proposal’s initial publication, first author Dr. Molderings had been practicing as a pharmacologist, geneticist, and immunologist for 20 years at University Hospital Bonn, where he remains today; co-author Dr. Brettner had been practicing as a hematologist/oncologist for more than 20 years; co-author Dr. Homann had been practicing as an internist for 43 years, including 19 years as chairman of the Department of Internal Medicine of the Evangelisches Waldkrankenhaus Bonn, a teaching hospital of University Hospital Bonn; and senior author Dr. Afrin had been practicing as a hematologist/oncologist for 16 years at the Medical University of South Carolina, where he continued serving for three more years before moving to the University of Minnesota for three years and then, since 2017, in private practice focusing exclusively in MCAD. In sum, the authors collectively had seen, at the time of their 2011 article’s publication, more than 500 patients whom they felt had MCAS as their root diagnosis. This proposal stemmed from the authors’ direct clinical observations of (1) the wide/multisystem range of symptoms and problems seen in these patients, (2) the usually normal (and stably so, even during symptomatic flares) levels of serum total tryptase (the only serum tryptase level readily determinable in routine clinical practice) in the great majority of these patients, (3) common elevations in other mediators relatively specific to the mast cell either at baseline and/or during flares, (4) increased MC counts (above the range the best available literature and expert opinion estimated to be normal) in tissue biopsies (more so from the gastrointestinal and genitourinary tracts than other sites) in a non-trivial proportion of these patients, and (5) quite rare demonstrations of clear evidence of MC aberrancies of any sort in the marrow, from the histologic down to the molecular level, thus largely obviating any need for a biopsy procedure which technically is non-invasive but which nevertheless can be painful and typically is dreaded by patients.  Criteria per Original Publication:   | Major Criteria:   1. Multifocal or disseminated dense infiltrates of mast cells in bone marrow biopsies and/or in sections of other extracutaneous organ(s) (e.g., gastrointestinal tract biopsies; CD117-, tryptase- and CD25-stained) 2. Unique constellation of clinical complaints as a result of a pathologically increased mast cell activity (mast cell mediator release syndrome) | | --- | | Minor Criteria:   1. Mast cells in bone marrow or other extracutaneous organ(s) show an abnormal morphology (>25%) in bone marrow smears or in histologies 2. Mast cells in bone marrow express CD2 and/or CD25 3. Detection of genetic changes in mast cells from blood, bone marrow or extracutaneous organs for which an impact on the state of activity of affected mast cells in terms of an increased activity has been proved. 4. Evidence of a pathologically increased release of mast cell mediators by determination of the content of 5. tryptase in serum 6. *N*-methylhistamine in urine 7. heparin in plasma 8. chromogranin A in serum 9. other mast cell-specific mediators (e.g., leukotrienes, prostaglandin D2) | | Diagnosis established upon demonstration of both major criteria or at least one major criterion combined with at least one minor criterion (and in the unstated but inferred absence of any other disease better accounting for the patient’s problems). |   Interim Updates: An update published in 2016 [36] included, as an additional minor criterion, response to any treatment targeted at MCs or their mediators. This additional minor criterion was added specifically in emerging recognition of (1) the likely great prevalence of the disease world-wide, (2) the great challenges in accessing testing for mediators relatively specific to the MC in many areas of the world, and (3) fairly ready access throughout the world to biopsy procedures and modern tissue testing needed to identify MCs. In other words, given the ability to improve the lives of most MCAS patients with MC-directed therapy once properly diagnosed, it did not seem appropriate to deprive MCAS patients of improved quality of life simply because they resided in an area with poor access to modern MC mediator testing.  Criteria Per Most Recent Published Revision/Restatement:   | Major Criterion:   1. Constellation of clinical complaints attributable to pathologically increased MC activity (MC mediator release syndrome) | | --- | | Minor Criteria:   1. Multifocal or disseminated infiltrates of MCs in marrow and/or extracutaneous organ(s) (e.g., gastrointestinal or genitourinary tract; >19 MCs/high power field) 2. Abnormal spindle-shaped morphology in >25% of MCs in marrow or other extracutaneous organ(s) 3. Abnormal MC expression of CD2 and/or CD25 (i.e., co-expression of CD117/CD25 or CD117/CD2) 4. MC genetic changes (e.g., activating KIT codon 419, 509 or 560 mutations) shown to increase MC activity 5. Evidence (typically from body fluids such as whole blood, serum, plasma, or urine) of above-normal levels of MC mediators including:   • tryptase  • histamine or its metabolites (e.g., N-methylhistamine)  • heparin  • chromogranin A (note potential confounders of cardiac or renal failure, neuroendocrine tumors, recent proton pump inhibitor use, or chronic atrophic gastritis)  • other relatively MC-specific mediators (e.g., eicosanoids including prostaglandin (PG) D2, its metabolite 11-β-PGF2α, or leukotriene E4)   1. Symptomatic response to inhibitors of MC activation or MC mediator production or action | | Diagnosis established upon demonstration of the major criterion combined with at least one minor criterion (and in the unstated but inferred absence of any other disease better accounting for the patient’s problems). | | Comments: This update was made in order to (1) clarify the threshold (≥ 20 MCs per high-power (400x) field) of the MC count in tissues above which one could reasonably conclude it is likely that some degree of chronic aberrant MCA is present, and (2) expand and clarify the range of MC mutational anomalies felt likely to be driving chronic aberrant MCA. (In our experience, most pathologists judge (based on a key 2006 paper [38]) that ≥ 20 MCs per high-power (400x) field is abnormal, though some pathologists disagree, offering other thresholds or even asserting there is no number that would be considered abnormal. It is important to recognize, though, that all of the studies to date have failed to definitively exclude MCAS patients from their healthy control populations, and with the prevalence of MCAS perhaps as high as 17% [39], such a flaw could easily lead to substantial contamination of the control population with unrecognized MCAS patients, diminishing the differences in the tissue MC counts between the MCAS and control populations to the point of (false) insignificance. Furthermore, this issue is even more confusing in the pediatric population, as some studies have suggested normal MC counts per high-power field in the range of 0-5 in various segments of the GI tract in this population [40], while other studies [41,42] have suggested higher numbers more congruent with the adult population; however, all of these pediatric studies have suffered the same key flaw as described above for the adult studies.) Also, in this update the major criterion of increased tissue MCs was down-graded to a minor criterion, as it was not felt appropriate (in a disease felt to be a *clinical* syndrome rooted in MC *activation*, not merely heightened *numbers* of MCs) to permit diagnosis by finding increased tissue MCs together with one or more of the minor criteria but without symptoms consistent with MCA. |   Published Criticisms:   1. Inclusion of certain laboratory markers of MCA which are considered by some investigators to be less specific to MCs, such as chromogranin A (CgA). CgA is known to be produced by MCs [43,44] and has been found elevated in 12-49% of MCAS patients [13,45,46]. The argument that CgA is less MC-specific than certain other MC mediators such as tryptase holds “some” validity since there are a few other conditions which can lead to elevation in CgA. For example, CgA can be elevated in cardiac, renal, or hepatic failure, in the setting of recent proton pump inhibitor use, neuroendocrine tumors, or chronic atrophic gastritis, but it is straightforward to exclude these alternative causes. However, since no known marker is 100% specific to originating in MCs (not even tryptase or heparin), the fact that CgA is not 100% specific for MC activation would not seem to be a reasonable objection for considering the marker to be of diagnostic utility. The only question then remains how much utility is accorded it, and by whom. The same rationale can be applied for consideration of elevated levels of histamine (another well-recognized mediator product of the MC and certain other cells, e.g., basophils, neurons, and gastric enterochromaffin-like cells [47]) as a diagnostic marker for MCAS. Fundamentally, it is crucial to keep in mind that there is no *single* finding which can presently confidently establish a diagnosis of MCAS. Rather, the diagnosis requires demonstration of an assortment of findings, all consistent with MCAS and not more suggestive of any alternative disease. That the diagnosis of such a complex disease cannot rest on a single finding should not be surprising, though it is possible that improvements in testing (e.g., routine assessment for any of the MC mutational profiles proven to be capable of driving MCA) may eventually advance to the point where a single finding permits diagnosis. 2. Inclusion of the minor criterion from the WHO consensus criteria for SM that at least 25% of the MCs should be of abnormal (typically spindled) morphology. However, in our accumulated experience to date across more than 10,000 MCAS patients, only extremely rare cases demonstrate such aberrant MC morphology to any extent (and otherwise meet diagnostic criteria for MCAS but not mastocytosis). As such, the utility of this criterion would seem to be virtually nil. |
| Popular/Proposed Moniker(s): “NEJM criteria”  Publication History:   1. 2015 [14]   Origin/Roots of the Proposal: Dr. Theoharis Theoharides has long been recognized globally as an expert in the full realm of MC diseases, pursuing clinical and laboratory investigation at Tufts University in Boston. In 2015 Dr. Theoharides, collaborating with Drs. Akin and Valent, published a prominent review regarding diagnostic and therapeutic approaches to MC disease, an effort which required two years of effort from conception to acceptance to achieve sufficient agreement among the authors and editors on all the points presented. Most of the review focused on the rare, if better known, area of SM, but some consideration was given to MCAS.  Original Diagnostic Criteria: The authors provided a diagnostic algorithm [14(Figure 2)] suggesting that MCAS could be diagnosed in patients with symptoms consistent with MCA *and* in whom tryptase was elevated either basally or by “20% + 2” upon a symptomatic event *and* if evaluation for mastocytosis was unrevealing *and* if one or more of certain other MC mediators (restricted to urinary testing, including prostaglandin D2, 11-β-prostaglandin-F2α, and *N*-methylhistamine) were also found to be elevated.  Comments/Critiques:   1. Given that the majority of MCAS patients have a normal tryptase level (at baseline and during symptomatic flares) [e.g.,13,45,46,48], diagnosis by this algorithm would seem to be heavily dependent on meeting the “20% + 2” criterion, and thus this proposal seems to fit largely within the consensus-1 school of thought. 2. It is noteworthy, though, that Dr. Theoharides subsequently (2019) published a review [33] in which he and his co-authors (Dr. Tsilioni in Dr. Theoharides’ lab at Tufts University, plus Dr. Ren, a collaborator in China) made a number of observations supportive of broader diagnostic criteria than the consensus-1 proposals, including (1) a suggestion to rename this area of disease as “mast cell mediator disorders” (MCMD), (2) suggestions that measurements of interleukin-6 (IL-6), IL-31, chemokine ligand 2 (CCL2), and C-X-C motif chemokine ligand 8 (CXCL8) should be considered in efforts to diagnose MCMD/MCAS, (3) endorsement (as in the Molderings *et al.* or consensus-2 school of thought) of the validity of examining tissue sections for increased numbers of MCs in diagnosing the disease, (4) a note that “tryptase levels could be both inadequate and misleading since MCs can secrete many mediators, especially cytokines and chemokines, without any tryptase,” and (5) a note, with regard to “20% + 2,” that “there are no published data supporting this equation.” |
| Popular/Proposed Moniker(s): “Weiler criteria”  Publication History:   1. 2019 [49]   Origin/Roots of the Proposal: MC disease expert and allergist/immunologist Catherine Weiler, long based at the Mayo Clinic in Rochester, Minnesota and a co-director of that institution’s Program for Mast Cell and Eosinophil Disorders, provided a slightly different perspective on the diagnostic approach to MCAS in a sole-authored article published several weeks after the Theoharides et al. 2019 paper [33].  Diagnostic Criteria:   1. Dr. Weiler endorsed the “20% + 2” formula and also noted that any of the urinary MC mediators accepted for diagnosis of MCAS needs to rise by at least 30% over its upper limit of normal. 2. Dr. Weiler also proposed a modification [49(Figure 3)] of the consensus-1 criteria/algorithm for incorporating consideration of hereditary alpha-tryptasemia (HAT), suggesting that a finding of “typical symptoms + labs” consistent with MCAS, together with a “response to drugs,” should lead to notation that a patient “probably” has MCAS, whereupon testing for alpha-tryptase gene copy number should be pursued, whereupon (regardless of the result) it can then be asked whether diagnostic criteria for primary, secondary, or idiopathic MCAS are fulfilled. If not, a diagnosis of HAT without MCAS is made (or, if there is no increase in alpha-tryptase gene copy number, other MCAS-mimicking conditions should be considered), but if the MCAS diagnostic criteria are fulfilled, then a diagnosis of primary, secondary, or idiopathic MCAS should be made (with or without associated HAT).   Comments/Critiques:   1. As with the “20% + 2” formula, no data validating the “30% rise for urinary mediators” diagnostic constraint newly introduced in this paper were provided or cited. 2. Overall, this algorithm seems to fall fully into the consensus-1 camp, and it remains unclear, as discussed elsewhere in our present paper, what advantages (or disadvantages) a patient gains from being found to have HAT vs. MCAS. |
| Popular/Proposed Moniker(s): “AAAAI criteria”  Publication History:   1. 2019 [50]   Origin/Roots of the Proposal: Curiously, on the same day (August 27, 2019) Dr. Weiler’s proposal above [49] became available on-line, she and 15 co-authors citing themselves as the American Academy of Allergy, Asthma, and Immunology’s (AAAAI’s) Mast Cell Disorders Committee Work Group (most of them previously aligned with “consensus-1”-style publications) received acceptance of another paper providing yet another take on diagnostic criteria for MCAS.  Diagnostic Criteria: These criteria largely replicated the 2019 update [2] of the consensus-1 criteria but further restricted the diagnosis to only those patients demonstrating “recurrent systemic anaphylaxis.”  Comments/Critiques:   1. Unsurprisingly, given that many MCAS patients have not suffered anaphylaxis despite decades of suffering other morbidities of the disease, there was an immediate surge of concern in the MCAS patient community, generally fearing their diagnosis would be denied, and treatment they knew to be helpful would be stopped, if they had not suffered recurrent anaphylaxis. 2. Less than three weeks after the publication on-line of the AAAAI paper, The Mastocytosis Society (TMS, the dominant patient support group in the MC disease space in the U.S.) sent a letter to its medical advisory board expressing concern about this new criterion by not only the organization’s leadership but also many patients from whom TMS leadership had heard in that short span (some noted in the letter to represent other mast cell disease patient groups with up to 20,000 members). The letter concluded, with reference to the European Competence Network in Mastocytosis (ECNM) meeting planned at MUV in August 2020 to, in part, further address diagnostic criteria for MCAS, “we feel it is critical that the criteria accurately represent our MCAS patient experience within the mast cell disease community.” We agree. It remains unclear at this time whether the AAAAI revision of the consensus-1 criteria will be broadly adopted (whether as revised “consensus-1” criteria or, perhaps, as a new proposal for, essentially, “consensus-3” criteria). |

References

Valent P, Akin C, Arock M, Brockow K, Butterfield JH, Carter MC, Castells M, Escribano L, Hartmann K, Lieberman P, Nedoszytko B, Orfao A, Schwartz LB, Sotlar K, Sperr WR, Triggiani M, Valenta R, Horny H-P, Metcalfe DD. Definitions, criteria, and global classification of mast cell disorders with special reference to mast cell activation syndromes: a consensus proposal. Int Arch Allergy Immunol 2012;157:215-225, DOI: 10.1159/000328760.

Valent P, Akin C, Bonadonna P, Hartmann K, Brockow K, Niedoszytko M, Nedoszytko B, Siebenhaar F, Sperr WR, Oude Elberink JNG, Butterfield JH, Alvarez-Twose I, Sotlar K, Reiter A, Kluin-Nelemans HC, Hermine O, Gotlib J, Broesby-Olsen S, Orfao A, Horny HP, Triggiani M, Arock M, Schwartz LB, Metcalfe DD. Proposed diagnostic algorithm for patients with suspected mast cell activation syndrome. J Allergy Clin Immunol Pract 2019 Apr;7(4):1125-1133.e1, DOI: 10.1016/j.jaip.2019.01.006.

Akin C, Valent P, Metcalfe DD. Mast cell activation syndrome: proposed diagnostic criteria. J Allergy Clin Immunol 2010;126:1099-1104e4, DOI: 10.1016/j.jaci.2010.08.035.

Molderings GJ, Homann J, Raithel M, Frieling T; Interdisciplinary Multicenter Research Group on Systemic Mast Cell Activation Disease, Germany. Toward a global classification of mast cell activation diseases. J Allergy Clin Immunol 2011 May;127(5):1311, DOI: 10.1016/j.jaci.2010.12.1113.

Afrin LB, Molderings GJ. A concise, practical guide to diagnostic assessment for mast cell activation disease. World J Hematol 2014 Feb 6;3(1):1-17, DOI: 10.5315/wjh.v3.i1.1.

Nurmatov UB, Rhatigan E, Simons FE, Sheikh A. H1-antihistamines for primary mast cell activation syndromes: a systematic review. Allergy 2015 Sep;70(9):1052-61, DOI: 10.1111/all.12672.

Valent P, Bonadonna P, Hartmann K, Broesby-Olsen S, Brockow K, Butterfield JH, Triggiani M, Lyons JJ, Oude Elberink JNG, Arock M, Metcalfe DD, Akin C. Why the 20% + 2 tryptase formula is a diagnostic gold standard for severe systemic mast cell activation and mast cell activation syndrome. Int Arch Allergy Immunol 2019;180(1):44-51, DOI: 10.1159/000501079.

Baretto RL, Beck S, Heslegrave J, Melchior C, Mohamed O, Ekbote A, Huissoon AP, Krishna MT. Validation of international consensus equation for acute serum total tryptase in mast cell activation: a perioperative perspective. Allergy 2017 Dec;72(12):2031-2034, DOI: 10.1111/all.13226.

De Schryver S, Halbrich M, Clarke A, La Vieille S, Eisman H, Alizadehfar R, Joseph L, Morris J, Ben-Shoshan M. Tryptase levels in children presenting with anaphylaxis: Temporal trends and associated factors. J Allergy Clin Immunol 2016 Apr;137(4):1138-1142, DOI: 10.1016/j.jaci.2015.09.001.

Francis A, Fatovich DM, Arendts G, Macdonald SP, Bosio E, Nagree Y, Mitenko HM, Brown SG. Serum mast cell tryptase measurements: Sensitivity and specificity for a diagnosis of anaphylaxis in emergency department patients with shock or hypoxaemia. Emerg Med Australas 2018 Jun;30(3):366-374, DOI: 10.1111/1742-6723.12875.

Frieling T, Meis K, Kolck UW, Homann J, Hülsdonk A, Haars U, Hertfelder HJ, Oldenburg J, Seidel H, Molderings GJ. Evidence for mast cell activation in patients with therapy-resistant irritable bowel syndrome. Z Gastroenterol 2011 Feb;49(2):191-4, DOI: 10.1055/s-0029-1245707.

Sprung J, Weingarten TN, Schwartz LB. Presence or absence of elevated acute total serum tryptase by itself is not a definitive marker for an allergic reaction. Anesthesiology 2015 Mar;122(3):713-4, DOI: 10.1097/ALN.0000000000000584.

Afrin LB, Self S, Menk J, Lazarchick J. Characterization of mast cell activation syndrome. Am J Med Sci 2017 Mar;353(3):207-215, DOI: 10.1016/j.amjms.2016.12.013.

1. Theoharides TC, Valent P, Akin C. Mast cells, mastocytosis, and related disorders. N Engl J Med 2015 Jul 9;373(2):163-72, DOI: 10.1056/NEJMra1409760.

Schwartz LB. Diagnostic value of tryptase in anaphylaxis and mastocytosis. Immunol Allergy Clin North Am 2006 Aug;26(3):451-63.

Metcalfe DD, Pawankar R, Ackerman SJ, Akin C, Clayton F, Falcone FH, Gleich GJ, Irani AM, Johansson MW, Klion AD, Leiferman KM, Levi-Schaffer F, Nilsson G, Okayama Y, Prussin C, Schroeder JT, Schwartz LB, Simon HU, Walls AF, Triggiani M. Biomarkers of the involvement of mast cells, basophils and eosinophils in asthma and allergic diseases. World Allergy Organ J 2016 Feb 11;9:7, DOI: 10.1186/s40413-016-0094-3.

Schwartz LB, Min HK, Ren S, Xia HZ, Hu J, Zhao W, Moxley G, Fukuoka Y. Tryptase precursors are preferentially and spontaneously released, whereas mature tryptase is retained by HMC-1 cells, Mono-Mac-6 cells, and human skin-derived mast cells. J Immunol 2003 Jun 1;170(11):5667-73.

Caughey GH. Mast cell tryptases and chymases in inflammation and host defense. Immunol Rev 2007;217(1):141-54.

Vitte J. Human mast cell tryptase in biology and medicine. Mol Immunol 2015 Jan;63(1):18-24, DOI: 10.1016/j.molimm.2014.04.001.

Beceiro C, Campos J, Valcarcel MA, Fenger RV, Lojo S, Linneberg A, Vidal C, Gonzalez-Quintela A. Serum concentrations of mast cell tryptase are reduced in heavy drinkers. Alcohol Clin Exp Res 2015 Apr;39(4):672-8, DOI: 10.1111/acer.12682.

Abdelmotelb AM, Rose-Zerilli MJ, Barton SJ, Holgate ST, Walls AF, Holloway JW. Alpha-tryptase gene variation is associated with levels of circulating IgE and lung function in asthma. Clin Exp Allergy 2014 Jun;44(6):822-30, DOI: 10.1111/cea.12259.

Sprung J, Larson KJ, Divekar RD, Butterfield JH, Schwartz LB, Weingarten TN. Refractory intraoperative hypotension with elevated serum tryptase. Asia Pac Allergy 2015 Jan;5(1):47-50, DOI: 10.5415/apallergy.2015.5.1.47.

Brockow K, Schwartz LB. White paper: the tryptase test -- clinical use in dermatology and allergy. ThermoFisher Scientific 2018 Feb 21, <https://www.abacusdx.com/allergy/white-paper-tryptase-test-clinical-use-dermatology-allergy/>, accessed January 5, 2020.

Lyons JJ. Hereditary alpha tryptasemia: genotyping and associated clinical features. Immunol Allergy Clin North Am 2018 Aug;38(3):483-495, DOI: 10.1016/j.iac.2018.04.003.

Schliemann S, Seyfarth F, Hipler UC, Elsner P. Impact of age and heterophilic interference on the basal serum tryptase, a risk indication for anaphylaxis, in 1,092 dermatology patients. Acta Derm Venereol 2012 Sep;92(5):484-9, DOI: 10.2340/00015555-1245.

Buckley MG, Variend S, Walls AF. Elevated serum concentrations of beta-tryptase, but not alpha-tryptase, in Sudden Infant Death Syndrome (SIDS). An investigation of anaphylactic mechanisms. Clin Exp Allergy 2001 Nov;31(11):1696-704.

Hidvégi B, Nagy E, Szabó T, Temesvári E, Marschalkó M, Kárpáti S, Horváth A, Gergely P. Correlation between T-cell and mast cell activity in patients with chronic urticaria. Int Arch Allergy Immunol 2003 Oct;132(2):177-82.

Russell WJ, Smith WB. Pseudoanaphylaxis. Anaesth Intensive Care 2006 Dec;34(6):801-3.

Ruëff F, Przybilla B, Biló MB, Müller U, Scheipl F, Aberer W, Birnbaum J, Bodzenta-Lukaszyk A, Bonifazi F, Bucher C, Campi P, Darsow U, Egger C, Haeberli G, Hawranek T, Körner M, Kucharewicz I, Küchenhoff H, Lang R, Quercia O, Reider N, Severino M, Sticherling M, Sturm GJ, Wüthrich B. Predictors of severe systemic anaphylactic reactions in patients with Hymenoptera venom allergy: importance of baseline serum tryptase-a study of the European Academy of Allergology and Clinical Immunology Interest Group on Insect Venom Hypersensitivity. J Allergy Clin Immunol 2009 Nov;124(5):1047-54, DOI: 10.1016/j.jaci.2009.08.027.

Seidel S, Voller B, Geusau A, Wöhrl S. Severe anaphylaxis to hymenoptera stings: does the basal serum tryptase concentration really matter? Ann Allergy Asthma Immunol 2010 Aug;105(2):185-7, DOI: 10.1016/j.anai.2010.06.009.

Egner W, Sargur R, Shrimpton A, York M, Green K. A 17 year experience in perioperative anaphylaxis 1998-2015: harmonising optimal detection of mast cell mediator release. Clin Exp Allergy 2016 Nov;46(11):1465-1473, DOI: 10.1111/cea.12785.

Ibelgaufts H. “Mast Cells.” Cytokines Online Pathfinder Encyclopedia 2019. [http://www.cells-talk.com/index.php/page/copelibrary?key=mast%20cells](http://www.cells-talk.com/index.php/page/copelibrary?key=mast cells), accessed January 5, 2020.

Theoharides TC, Tsilioni I, Ren H. Recent advances in our understanding of mast cell activation - or should it be mast cell mediator disorders? Expert Rev Clin Immunol 2019 Jun;15(6):639-656, DOI: 10.1080/1744666X.2019.1596800

Valent P, Akin C. Doctor, I think I am suffering from MCAS: differential diagnosis and separating facts from fiction. J Allergy Clin Immunol Pract 2019 Apr;7(4):1109-1114, DOI: 10.1016/j.jaip.2018.11.045.

1. Molderings GJ, Brettner S, Homann J, Afrin LB. Mast cell activation disease: a concise practical guide for diagnostic workup and therapeutic options. J Hematol Oncol 2011 Mar 22;4:10, DOI: 10.1186/1756-8722-4-10, <https://jhoonline.biomedcentral.com/articles/10.1186/1756-8722-4-10>, accessed January 5, 2020.
2. Afrin LB, Butterfield JH, Raithel M, Molderings GJ. Often seen, rarely recognized: mast cell activation disease – a guide to diagnosis and therapeutic options. Ann Med 2016;48(3):190-201, DOI: 10.3109/07853890.2016.1161231.
3. Molderings GJ, Zienkiewicz T, Homann J, Menzen M, Afrin LB. Risk of solid cancer in patients with mast cell activation syndrome: Results from Germany and USA. F1000Res 2017 Oct 26;6:1889, DOI: 10.12688/f1000research.12730.1.

Jakate S, Demeo M, John R, Tobin M, Keshavarzian A. Mastocytic enterocolitis: increased mucosal mast cells in chronic intractable diarrhea. Arch Pathol Lab Med 2006 Mar;130(3):362-7.

Molderings GJ, Haenisch B, Bogdanow M, Fimmers R, Nöthen MM. Familial occurrence of systemic mast cell activation disease. PLoS One 2013;8:e76241, DOI: 10.1371/journal.pone.0076241.

Chernetsova E, Sullivan K, de Nanassy J, Barkey J, Mack D, Nasr A, El Demellawy D. Histologic analysis of eosinophils and mast cells of the gastrointestinal tract in healthy Canadian children. Hum Pathol 2016 Aug;54:55-63, DOI: 10.1016/j.humpath.2016.03.004.

Saad AG. Normal quantity and distribution of mast cells and eosinophils in the pediatric colon. Pediatr Dev Pathol 2011 Jul-Aug;14(4):294-300, DOI: 10.2350/10-07-0878-OA.

Tison BE, Debrosse CW, Rainey HF, Collins MH, Putnam PE, Rothenberg ME, Abonia PP. Number and distribution of mast cells in the pediatric gastrointestinal tract. Journal of Allergy and Clinical Immunology 2010 Feb 1;125(2):AB182.

Tsuchiya S, Tachida Y, Segi-Nishida E, Okuno Y, Tamba S, Tsujimoto G, Tanaka S, Sugimoto Y. Characterization of gene expression profiles for different types of mast cells pooled from mouse stomach subregions by an RNA amplification method. BMC Genomics 2009 Jan 20;10:35, DOI: 10.1186/1471-2164-10-35.

Aung G, Niyonsaba F, Ushio H, Kajiwara N, Saito H, Ikeda S, Ogawa H, Okumura K. Catestatin, a neuroendocrine antimicrobial peptide, induces human mast cell migration, degranulation and production of cytokines and chemokines. Immunology 2011 Apr;132(4):527-39, DOI: 10.1111/j.1365-2567.2010.03395.x.

Zenker N, Afrin LB. Utilities of various mast cell mediators in diagnosing mast cell activation syndrome. Blood 2015;126(23):5174, <https://ashpublications.org/blood/article/126/23/5174/94641/Utilities-of-Various-Mast-Cell-Mediators-in>, accessed January 5, 2020.

Vysniauskaite M, Hertfelder HJ, Oldenburg J, Dreßen P, Brettner S, Homann J, Molderings GJ. Determination of plasma heparin level improves identification of systemic mast cell activation disease. PLoS One 2015 Apr 24;10(4):e0124912, DOI: 10.1371/journal.pone.0124912.

O'Mahony L, Akdis M, Akdis CA. Regulation of the immune response and inflammation by histamine and histamine receptors. J Allergy Clin Immunol 2011 Dec;128(6):1153-62, DOI: 10.1016/j.jaci.2011.06.051

Hamilton MJ, Hornick JL, Akin C, Castells MC, Greenberger NJ. Mast cell activation syndrome: a newly recognized disorder with systemic clinical manifestations. J Allergy Clin Immunol 2011 Jul;128(1):147-152.e2, DOI: 10.1016/j.jaci.2011.04.037.

Weiler CR. Mast cell activation syndrome: tools for diagnosis and differential diagnosis. J Allergy Clin Immunol Pract 2019 Aug 27. pii: S2213-2198(19)30729-9, DOI: 10.1016/j.jaip.2019.08.022.

1. Weiler CR, Austen KF, Akin C, Barkoff MS, Bernstein JA, Bonadonna P, Butterfield JH, Carter M, Fox CC, Maitland A, Pongdee T, Mustafa SS, Ravi A, Tobin MC, Vliagoftis H, Schwartz LB. AAAAI Mast Cell Disorders Committee Work Group report: mast cell activation syndrome (MCAS) diagnosis and management. J Allergy Clin Immunol 2019 Aug 30. pii: S0091-6749(19)31116-9, DOI: 10.1016/j.jaci.2019.08.023.
